# Supplementary material for: miR-195 competes with HuR to modulate stim1 mRNA stability and regulate cell migration
Source: PubMed Central journal article supplement (PMC3763549; doi:10.1093/nar/gkt565), 2013-06-25
Supplement: supp_gkt565_nar-01253-x-2013-File010.pdf [file supp_gkt565_nar-01253-x-2013-File010.pdf]

Table 1. Primers for STIM1 luciferase reporters

| Name           | sequence                                      | Cutting site |
|----------------|-----------------------------------------------|--------------|
| pmirGLO-5UTR-F | CTCCCTCCCCACCTCCGTG                           | N/A          |
| pmirGLO-5UTR-B | CCATGACGGAAGGTCTCGGT                          | N/A          |
| pmirGLO-CR-F   | ATGGATGTGTGCGCTCGTCT                          | N/A          |
| pmirGLO-CR-B   | CTACTTCTTAAGAGGCTTCT                          | N/A          |
| pmirGLO-3UTR-F | GCAGAATAGGGTGGTAGTAT                          | N/A          |
| pmirGLO-3UTR-B | AAAATCTCCTACATGCTTTA                          | N/A          |
| pmirGLO-F1-F   | CCG <b>CTCGAG</b> GCAGAATAGGGTGGTAGTAT        | <i>Xho</i> I |
| pmirGLO-F1-B   | G <b>CTCTAGAT</b> CCCCACAAC <b>TGCTAGGAAC</b> | <i>Xba</i> I |
| pmirGLO-F2-F   | CCG <b>CTCGAG</b> CCTAGCAGTTGTGGGGAAGA        | <i>Xho</i> I |
| pmirGLO-F2-B   | G <b>CTCTAGA</b> AGGGGAGCAGAGGTAAGAGG         | <i>Xba</i> I |
| pmirGLO-F3-F   | CCG <b>CTCGAG</b> TGTGGGCTCCGAGGCAGTTG        | <i>Xho</i> I |
| pmirGLO-F3-B   | G <b>CTCTAGAGG</b> GAGAAGTGGTCACACAGCA        | <i>Xba</i> I |
| pmirGLO-F4-F   | CTAG <b>GCTAGCT</b> GCCTGCACAGCATCCTCCC       | <i>Nhe</i> I |
| pmirGLO-F4-B   | <b>ACGCGT</b> CGACAAAATCTCCTACATGCTTTA        | <i>Sal</i> I |
| pMS2-3UTR-F    | AGCAGTAAGCGGCCGCTCGAGGCAGAATAGGGTGGTAGTAT     | N/A          |
| pMS2-3UTR-B    | CCCTCTAGATGCATGCTCGAGAAAATCTCCTACATGCTTTA     | N/A          |

Table 2. Primers for STIM1 biotin pull down

| NAME             | SEQUENCE                                             |
|------------------|------------------------------------------------------|
| STIM1-5UTR-bF    | CCAAGCTTCTAATACGACTCACTATAGGGAGACTCCCTCCCCACCTCCGTG  |
| STIM1-5UTR-B     | CCATGACGGAAGGTCTCGGT                                 |
| STIM1-CR-bF      | CCAAGCTTCTAATACGACTCACTATAGGGAGAATGGATGTGTGCGCTCGTCT |
| STIM1-CR-B       | CTACTTCTTAAGAGGCTTCT                                 |
| STIM1-3UTR-bF    | CCAAGCTTCTAATACGACTCACTATAGGGAGAGCAGAATAGGGTGGTAGTAT |
| STIM1-3UTR-B     | AAAATCTCCTACATGCTTTA                                 |
| 3UTR-F1-F        | CCGCTCGAGGCAGAATAGGGTGGTAGTAT                        |
| 3UTR-F1-B        | GCTCTAGATCCCCACAAGTCTAGGAAC                          |
| 3UTR-F2-bF       | CCAAGCTTCTAATACGACTCACTATAGGGAGACCTAGCAGTTGTGGGGAAGA |
| 3UTR-F2-F        | CCGCTCGAGCCTAGCAGTTGTGGGGAAGA                        |
| 3UTR-F2-B        | GCTCTAGAAGGGGAGCAGAGGTAAGAGG                         |
| 3UTR-F3-bF       | CCAAGCTTCTAATACGACTCACTATAGGGAGATGTGGGCTCCGAGGCAGTTG |
| 3UTR-F3-F        | CCGCTCGAGTGTGGGCTCCGAGGCAGTTG                        |
| 3UTR-F3-B        | GCTCTAGAGGAGAAGTGGTCACACAGCA                         |
| 3UTR-F4-bF       | CCAAGCTTCTAATACGACTCACTATAGGGAGATGCCTGCACAGCATCCTCCC |
| 3UTR-F4-F        | CTAGCTAGCTGCCTGCACAGCATCCTCCC                        |
| 3UTR-F4-B        | ACGCGTCGACAAAATCTCCTACATGCTTTA                       |
| 3UTR-F1-1-B      | AGGGCAGGTATGTACAGTGC                                 |
| 3UTR-F1-2-F      | CCAAGCTTCTAATACGACTCACTATAGGGAGAGGCCATGGAGGGGCTGGCCC |
| 3UTR-F1-2-B      | GGGAACAGCAACTAAGACAT                                 |
| 3UTR-F1-3-F      | CCAAGCTTCTAATACGACTCACTATAGGGAGAGCTGCTGTCACATCCTCTCC |
| 3UTR-F4-1-B      | CTGGAAGAGGGGAGGCGTCA                                 |
| 3UTR-F4-2-F      | CCAAGCTTCTAATACGACTCACTATAGGGAGATGAAGCTGCTGTGTGACCAC |
| 3UTR-F4-2-B      | CAGCCCCAGCTGCACCCAAC                                 |
| 3UTR-F4-3-F      | CCAAGCTTCTAATACGACTCACTATAGGGAGATCTGTCATGCCTTTACCCTG |
| 3UTR-F4-3delta-B | CCCATGTGAGGGTGTCCAGG                                 |
